# Supplementary material for: N,S–Codoped hierarchical porous carbon spheres embedded with cobalt nanoparticles as efficient bifunctional oxygen electrocatalysts for rechargeable zinc-air batteries
Source: Royal Society of Chemistry journal article supplement (doi:10.1039/c9nr07632h), 2019-01-01
Supplement: c9nr07632h1.pdf [file c9nr07632h1.pdf]

## Electronic Supplementary Information

# **N,S-Codoped Hierarchical Porous Carbon Spheres Embedded with Cobalt Nanoparticles as Efficient Bifunctional Oxygen Electrocatalysts for Rechargeable Zinc-Air Batteries**

Xiaojing Zhu<sup>a</sup>, Jiale Dai<sup>a</sup>, Ligui Li<sup>a, b, c, \*</sup>, Zexing Wu<sup>d</sup>, Shaowei Chen<sup>a, e, \*</sup>

<sup>a</sup>New Energy Research Institute, School of Environment and Energy, South China University of Technology, Guangzhou Higher Education Mega Centre, Guangzhou, 510006, China.

E-mail: [esguili@scut.edu.cn](mailto:esguili@scut.edu.cn).

<sup>b</sup> Key Lab of Pollution Control and Ecosystem Restoration in Industry Clusters, Ministry of Education, South China University of Technology, Guangzhou 510641, China.

<sup>c</sup>State Key Laboratory of Polymer Physics and Chemistry, Changchun Institute of Applied Chemistry, Chinese Academy of Sciences, Changchun 130022, China.

<sup>d</sup>State Key Laboratory Base of Eco-chemical Engineering, College of Chemistry and Molecular Engineering, Qingdao University of Science & Technology, 53 Zhengzhou Road, 266042, Qingdao, China.

<sup>e</sup>Department of Chemistry and Biochemistry, University of California, 1156 High street, Santa Cruz, California 95064, USA.

E-mail: [shaowei@ucsc.edu](mailto:shaowei@ucsc.edu).

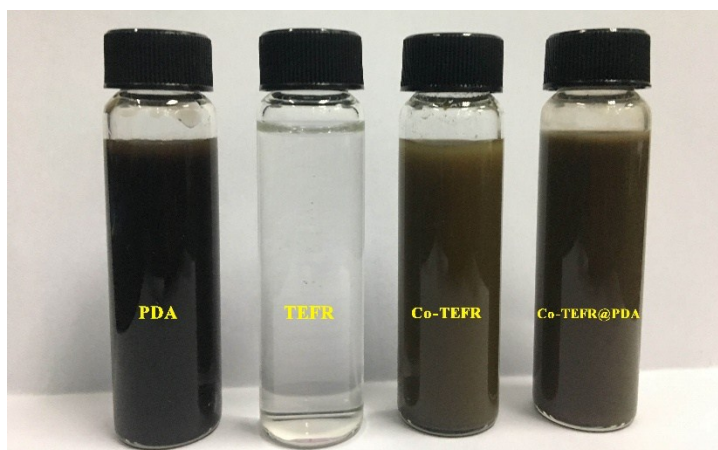

**Figure S1.** Photographs of different precursor samples.

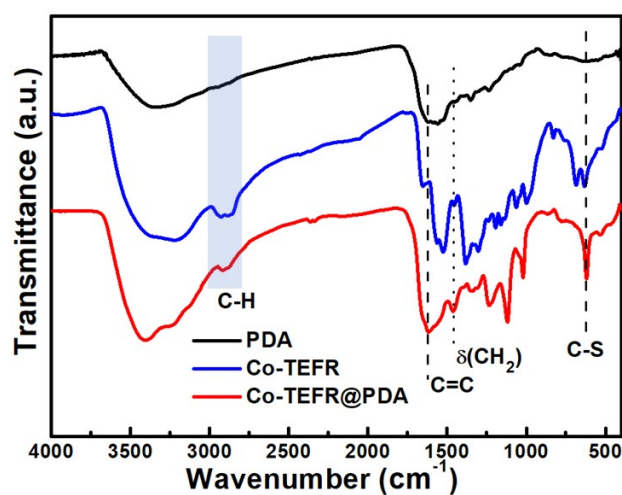

**Figure S2.** FTIR spectra of various precursor samples.

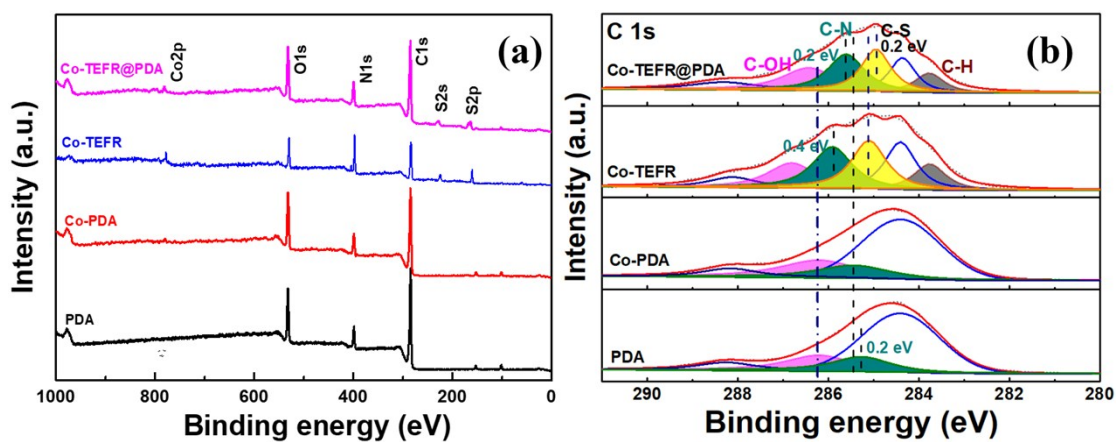

**Figure S3.** (a) XPS survey spectra and (b) high-resolution C 1s XPS spectra of different precursor samples.

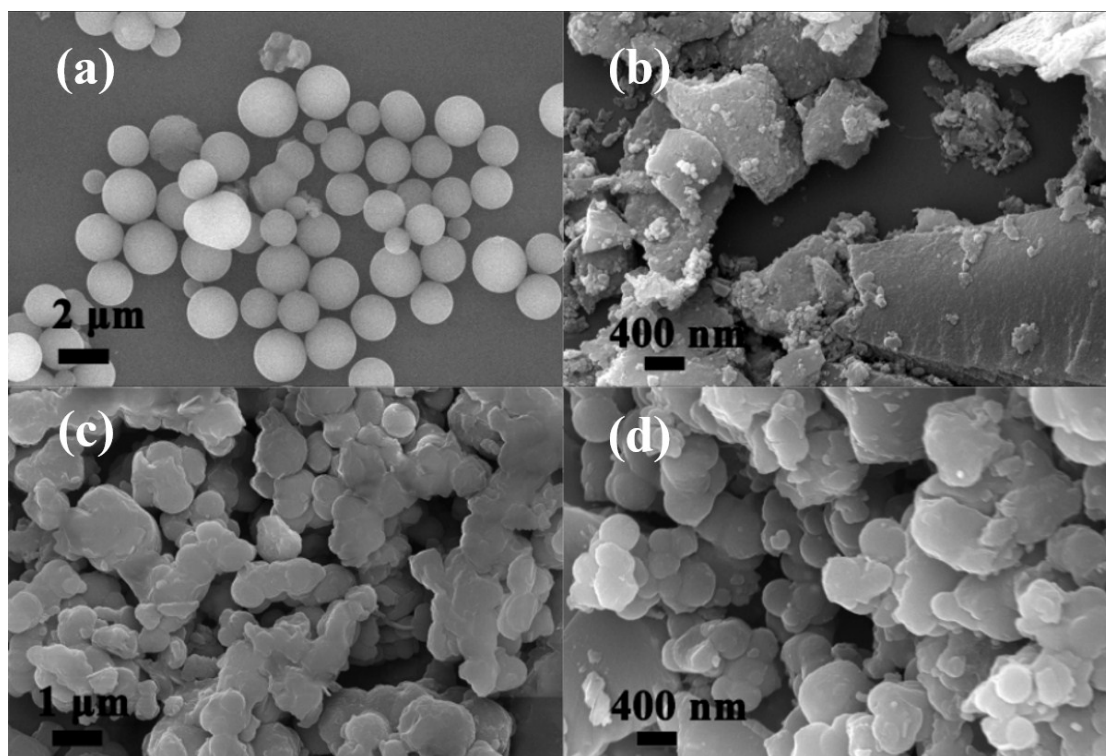

**Figure S4.** SEM images of (a) precursor Co-TEFR, and (b) the corresponding Co@NSC derived from the carbonization of Co-TEFR, (c) Co-PDA precursor, and (d) the corresponding Co@NC derived from the carbonization of Co-PDA.

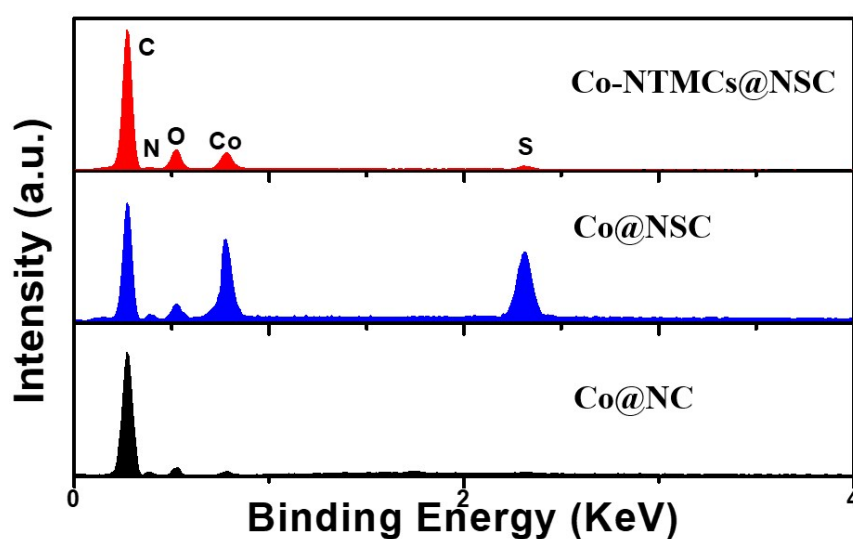

**Figure S5.** EDS spectra of Co-NTMCs@NSC, Co @NSC and Co@NC.

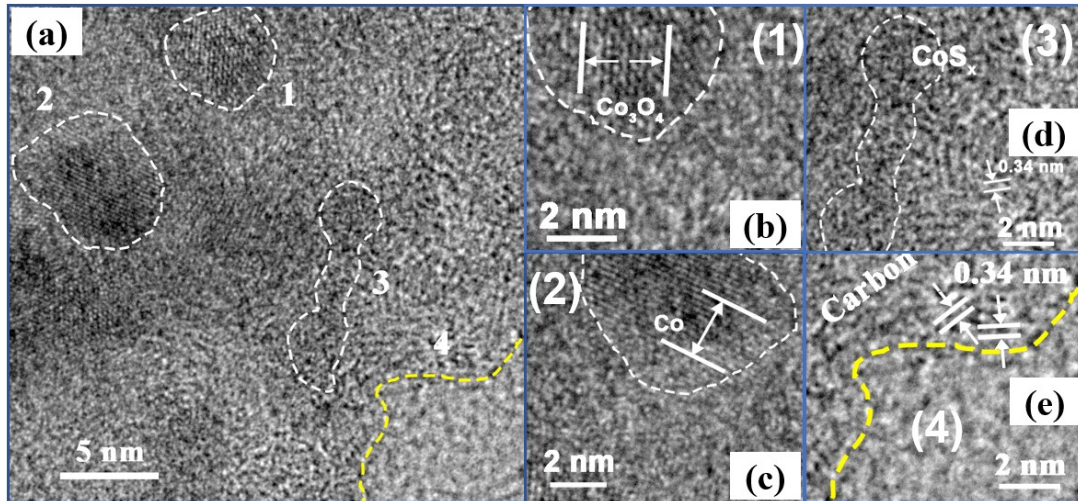

**Figure S6.** (a) The HR-TEM images of Co-NTMCs@NSC; (b, c, d, e) The enlarged images of the selected region in panel a.

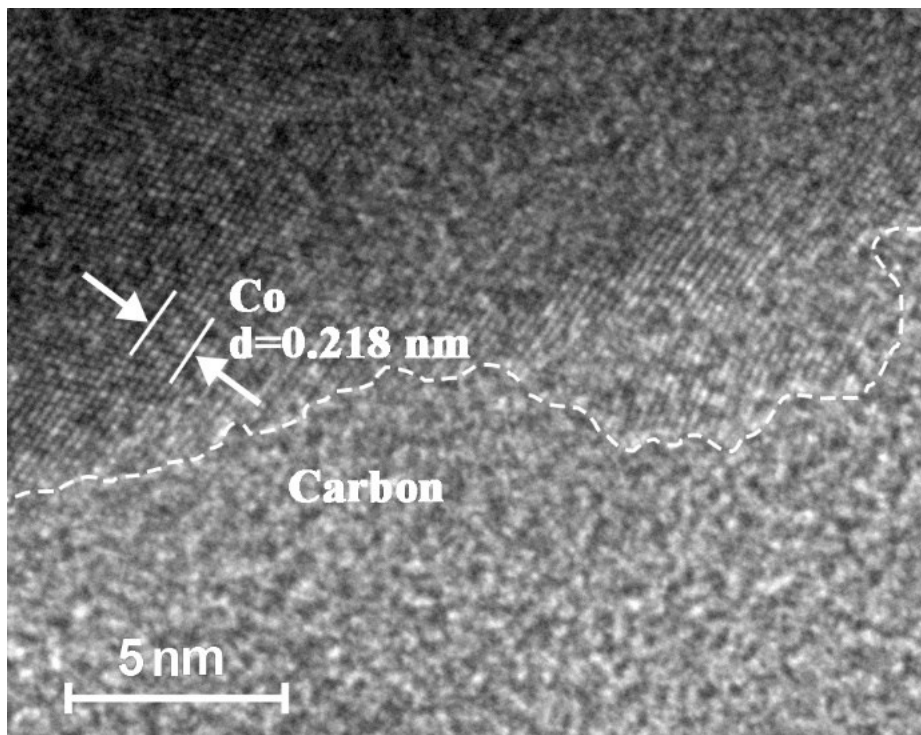

**Figure S7.** A HR-TEM image of Co-NTMCs@NSC to illustrate the interface between metallic Co and N, S-doped carbon matrix.



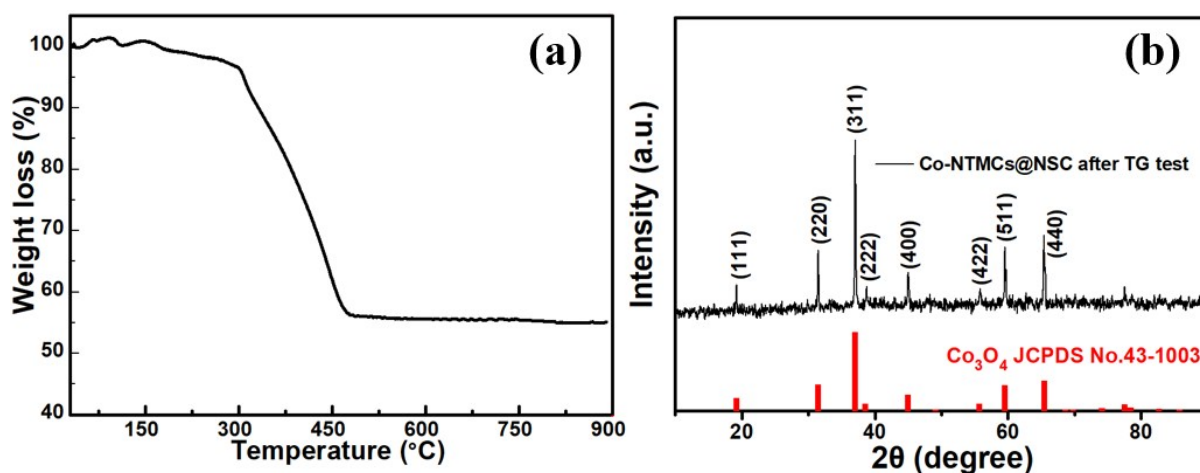

**Figure S8.** (a) TGA curve of Co-NTMCs@NSC and (b) XRD patterns of the Co-NTMCs@NSC sample after TG test.

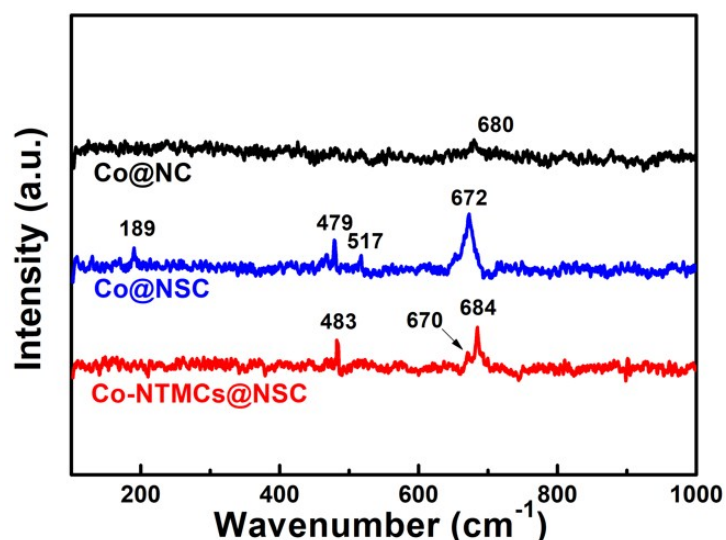

**Figure S9.** Raman spectra at low wavenumber region of 100–1000  $\text{cm}^{-1}$  for Co@NC, Co@NSC and the typical sample Co-NTMCs@NSC.

As shown in Figure S9, the weak peak at  $680 \text{ cm}^{-1}$  observed in Co@NC is attributed to the vibration of Co-O bond in  $\text{CoO}_x$  nanoparticles that probably due to the partial oxidation of metallic Co [R1]. Besides, the spectrum for Co@NSC displays typical Raman peaks at 672, 517, 479 and  $189 \text{ cm}^{-1}$ , which are assigned to vibration of Co-S bond in  $\text{Co}_4\text{S}_3$  particles. As for Co-NTMCs@NSC, the peaks at  $684 \text{ cm}^{-1}$  and  $483 \text{ cm}^{-1}$  are assigned to the Co-O vibration, while the one at  $670 \text{ cm}^{-1}$  is ascribed to the vibration of Co-S bond, indicating the coexistence of  $\text{CoS}_x$  and  $\text{Co}_3\text{O}_4$  species in Co-NTMCs@NSC.

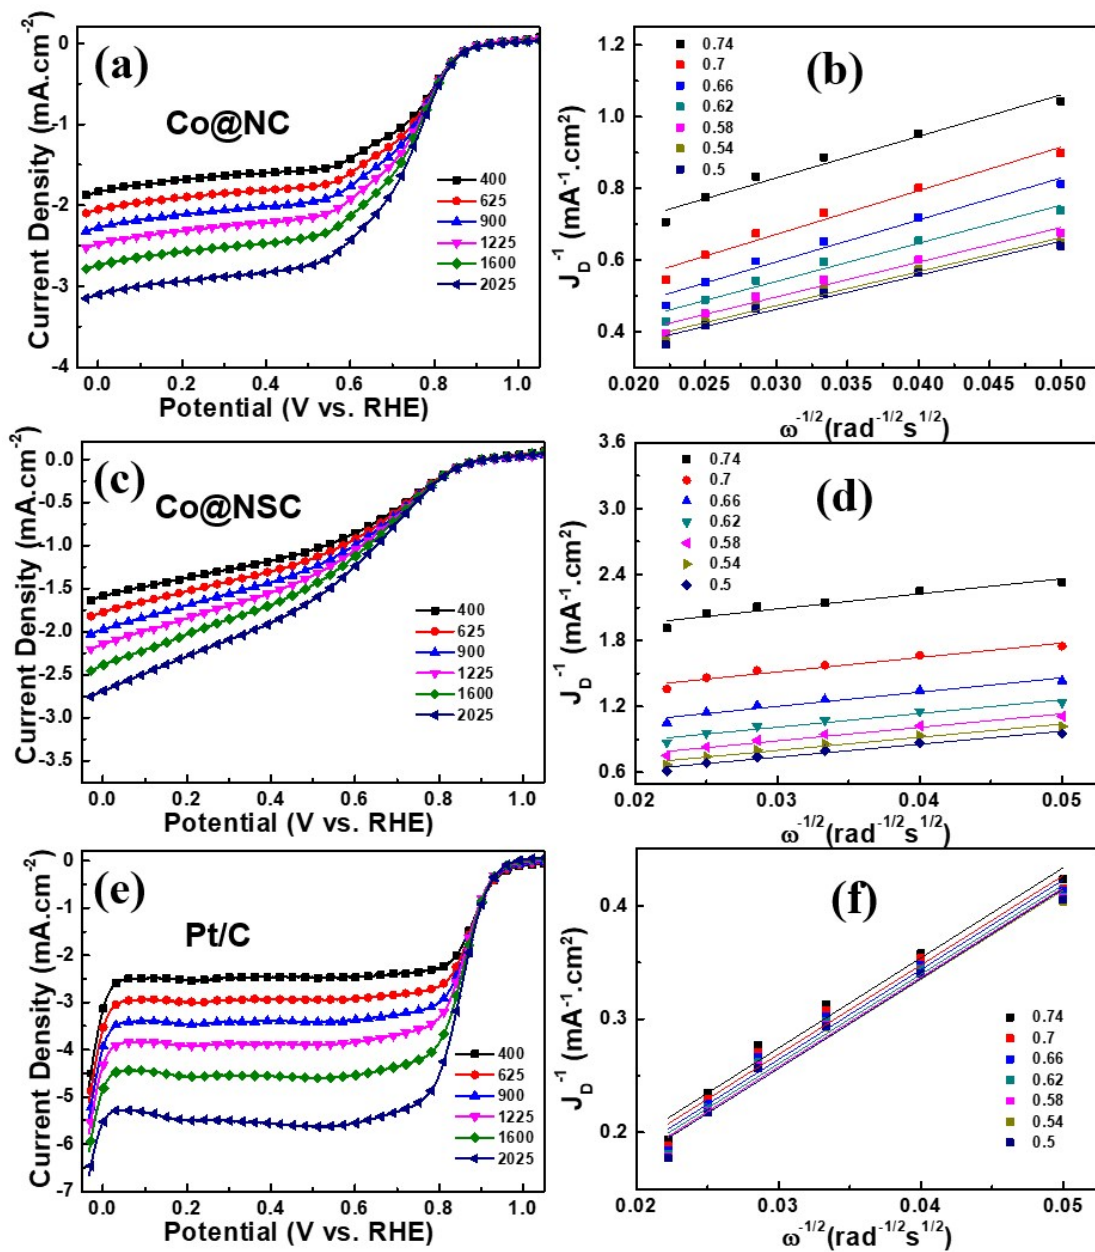

**Figure S10.** (a, c, e) RRDE curves and (b, d, f) K-L plots of Co@NC, Co@NSC and Pt/C in  $\text{O}_2$ -saturated 0.1 M KOH solution, respectively.

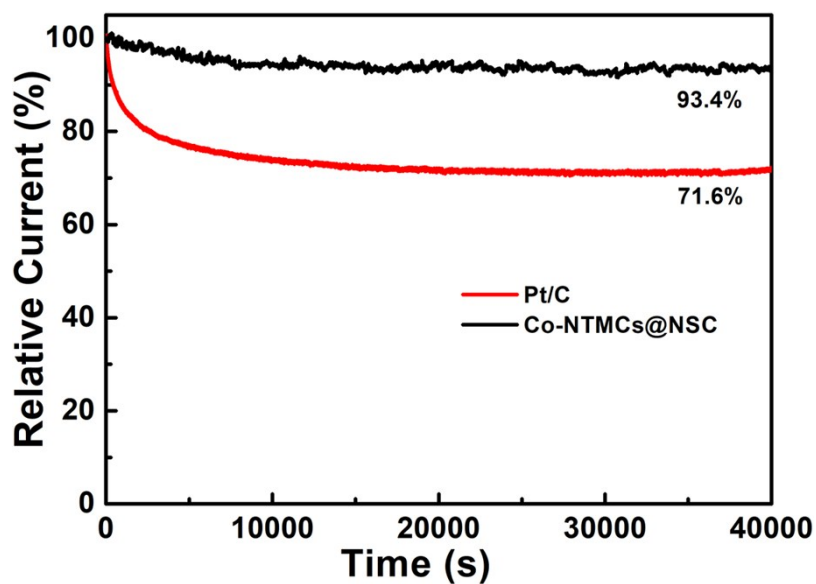

**Figure S11.** Chronoamperometric measurements of Co-NTMCs@NSC and Pt/C +0.50 V vs. RHE in an O<sub>2</sub>-saturated 0.1 M KOH electrolyte at an electrode rotation rate of 900 rpm.

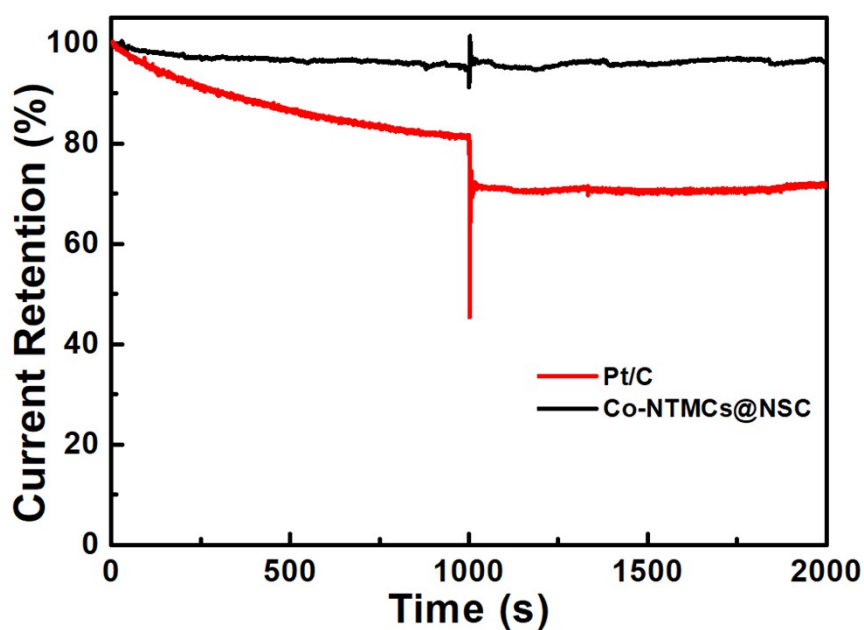

**Figure S12.** Chronoamperometric responses of Co-NTMCs@NSC and Pt/C in O<sub>2</sub>-saturated 0.1 M KOH in the presence of 1 M methanol solution at +0.50 V vs. RHE.

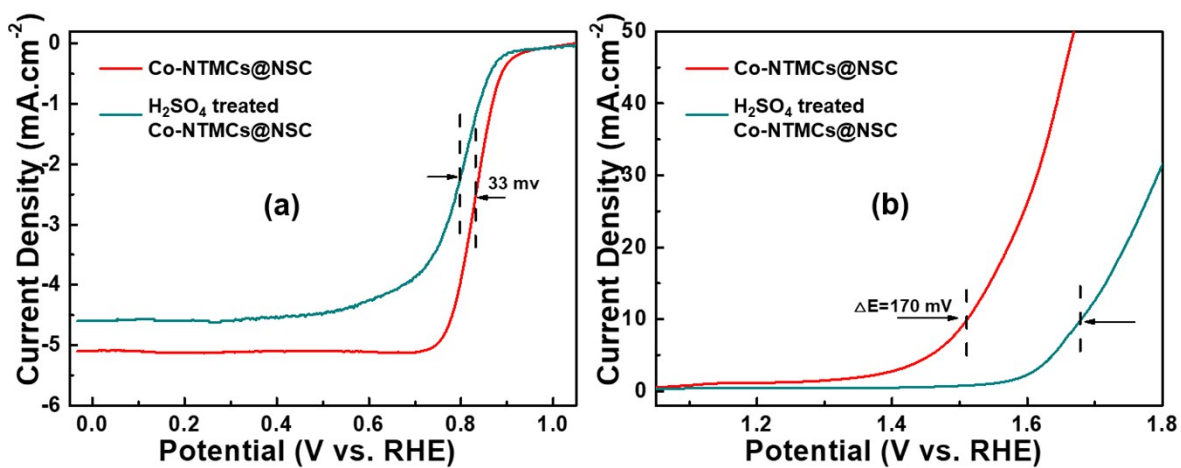

**Figure S13.** (a) LSV curves of Co-NTMCs@NSC for ORR and (b) LSV curves of Co-NTMCs@NSC for OER before and after etching treatment with 0.5 M  $\text{H}_2\text{SO}_4$  at 80 °C.



**Table S1.** The comparison on the key parameters of some leading transitional metal-based catalysts in ORR and OER electrocatalysis conducted in 0.1 M KOH electrolyte.

| Catalysts                               | ORR half-wave potential (V vs RHE) | OER potential at 10 mA/cm <sup>2</sup> (V vs RHE) | $\Delta E = E_{j=10} - E_{1/2}$ | Ref.                                      |
|-----------------------------------------|------------------------------------|---------------------------------------------------|---------------------------------|-------------------------------------------|
| N-GCNT/FeCo-3                           | 0.92                               | 1.73                                              | 0.81                            | Adv. Energy Mater. 2017, 7, 1602420       |
| Cu@NCNT/Co <sub>x</sub> O <sub>y</sub>  | 0.82                               | 1.6                                               | 0.78                            | Adv. Funct. Mater. 2017, 1705048          |
| Co-N-CNTs                               | 0.9                                | 1.69                                              | 0.79                            | Adv. Funct. Mater. 2017, 1705048          |
| CoIn <sub>2</sub> S <sub>4</sub> /S-rGO | 0.82                               | 1.6                                               | 0.78                            | Adv. Energy Mater. 2018, 1802263          |
| N-GCNT/FeCo-3                           | 0.92                               | 1.73                                              | 0.81                            | Adv. Energy Mater. 2017, 7, 1602420       |
| P, N Co-doped graphene                  | 0.85                               | 1.55                                              | 0.7                             | Energy Environ. Sci., 2017, 10, 1186-1195 |
| ZIF-9_Fe3_Pyro                          | 0.81                               | 1.62                                              | 0.81                            | J Power Sources, 2019, 427, 299           |
| Fe-N-C                                  | 0.84                               | 1.6                                               | 0.76                            | J. Am. Chem. Soc. 138, 32, 10226-10231    |
| Co@Co <sub>3</sub> O <sub>4</sub> /NC-1 | 0.8                                | 1.65                                              | 0.85                            | Angew.Chem.Int. Ed. 2016, 55,4087-4091    |
| Co@Co <sub>3</sub> O <sub>4</sub> /NC-2 | 0.74                               | 1.64                                              | 0.9                             | Angew.Chem.Int. Ed. 2016, 55,4087-4091    |
| CoS <sub>x</sub> @PCN/rGO               | 0.78                               | 1.57                                              | 0.79                            | Adv. Energy Mater. 2018, 8, 1701642       |
| rGO/CB <sub>2</sub> /Co-Bi              | 0.7                                | 1.58                                              | 0.87                            | Adv. Energy Mater. 2018, 1801495          |
| Pt/C+RuO <sub>2</sub>                   | <b>0.85</b>                        | <b>1.59</b>                                       | <b>0.74</b>                     | <b>This work</b>                          |
| Co-NTMCs@NSC                            | <b>0.83</b>                        | <b>1.59</b>                                       | <b>0.76</b>                     | <b>This work</b>                          |

## Reference

[R1] Y. Niu, X. Huang, X. Wu, L. Zhao W. Hu and C. M. Li, One-pot synthesis of Co/N-doped mesoporous graphene with embedded Co/CoO<sub>x</sub> nanoparticles for efficient oxygen reduction reaction, *Nanoscale*, 2017, 9,10233–10239.
